# Supplementary material for: Impact of the COVID-19 pandemic on youth delinquency: A discontinuous growth analysis
Source: Frontiers journal article supplement (doi:10.3389/feduc.2023.1007807), 2023-04-14
Supplement: Table_1.DOCX [file Table_1.DOCX]

**Table S1**

*Unconditional Discontinuous Growth Models for Offenses Against a Person with Freely Estimated Random Effects on TIME, INTDIS, and SLOPEDIS*

|  | Poisson | RIP | NB | ZIP | RI–ZIP | ZINB |
| --- | --- | --- | --- | --- | --- | --- |
| Count model | | | | | | |
| Fixed effects |  |  |  |  |  |  |
| Intercept (γ00) | –8.377*** (.045) | –8.625*** (.089) | –8.591*** (.085) | –8.214*** (.051) | –8.574*** (.088) | –8.568*** (.085) |
| TIME(γ10) | –0.048*** (.012) | –0.015 (.007) | –0.019* (.008) | –0.045*** (.011) | –0.012 (.008) | –0.016* (.008) |
| INTDIS (γ20) | –0.362** (.119) | –0.482*** (.103) | –0.461*** (.113) | –0.485*** (.100) | –0.580*** (.105) | –0.504*** (.101) |
| SLOPEDIS (γ30) | 0.021 (.018) | –0.018 (.013) | –0.013 (.016) | 0.029 (.018) | –0.011 (.014) | –0.010 (.014) |
| Season (γ40) | –0.009*** (.002) | –0.012*** (.002) | –0.012*** (.002) | –0.005 (.003) | –0.005 (.003) | –0.007* (.003) |
| Random effects |  |  |  |  |  |  |
| Intercept (VAR[]) |  | 0.707 | 0.568 |  | 0.639 | 0.567 |
| TIME (VAR[]) | 0.009 | 0.001 | 0.000 | 0.001 | 0.000 | 0.000 |
| INTDIS (VAR[]) | 0.324 | 0.186 | 0.067 | 0.000 | 0.132 | 0.000 |
| SLOPEDIS (VAR[]) | 0.014 | 0.002 | 0.001 | 0.001 | 0.001 | 0.001 |
| Dispersion |  |  | 5.74 |  |  | 7.17 |
| Zero-inflated model | | | | | | |
| Intercept (π00) |  |  |  | –2.012*** (.198) | –5.134*** (1.424) | –6.802** (2.322) |
| Season (π10) |  |  |  | 0.051* (.020) | 0.277* (.110) | 0.373* (.173) |
| Model fit | | | | | | |
| DF | 11 | 15 | 16 | 13 | 17 | 18 |
| LogL | –3,734 | CP | CP | –3,710 | CP | CP |
| BIC | 7,557 | CP | CP | 7,524 | CP | CP |

*Note*. RIP = random intercept Poisson; NB = negative binomial; ZIP = zero-inflated Poisson; RI-ZIP = random intercept zero-inflated Poisson; ZINB = zero-inflated negative binomial; BIC = Bayesian information criterion; TIME = slope prior to the discontinuity; INTDIS = intercept discontinuity; SLOPEDIS = slope discontinuity; VAR = variance; DF = degrees of freedom; LogL = log likelihood; and CP = convergence problem.

**p* < .05, ***p* < .01, ****p* < .001.

**Table S2**

*Unconditional Discontinuous Growth Models for Property Offenses with Freely Estimated Random Effects on TIME, INTDIS, and SLOPEDIS*

|  | Poisson | RIP | NB | ZIP | RI–ZIP | ZINB |
| --- | --- | --- | --- | --- | --- | --- |
| Count model | | | | | | |
| Fixed effects |  |  |  |  |  |  |
| Intercept (γ00) | –8.764*** (.055) | –8.999*** (.096) | –8.972*** (.093) | –8.550*** (.062) | –8.819*** (.094) | –8.945*** (.099) |
| TIME(γ10) | –0.048*** (.014) | –0.013 (.011) | –0.015 (.011) | –0.044** (.014) | –0.009 (.009) | –0.010 (.011) |
| INTDIS (γ20) | –0.174 (.139) | –0.335** (.107) | –0.329* (.133) | –0.182 (.139) | –0.353** (.127) | –0.400** (.124) |
| SLOPEDIS (γ30) | –0.010 (.021) | –0.051** (.019) | –0.048** (.017) | –0.016 (.022) | –0.055** (.018) | –0.045* (.019) |
| Season (γ40) | –0.002 (.003) | –0.005 (.003) | –0.005 (.003) | 0.003 (.004) | –0.001 (.004) | 0.001 (.004) |
| Random effects |  |  |  |  |  |  |
| Intercept (VAR[]) |  | 0.587 | 0.521 |  | 0.558 | 0.520 |
| TIME (VAR[]) | 0.011 | 0.000 | 0.000 | 0.010 | 0.000 | 0.000 |
| INTDIS (VAR[]) | 0.328 | 0.000 | 0.000 | 0.202 | 0.023 | 0.000 |
| SLOPEDIS (VAR[]) | 0.016 | 0.000 | 0.001 | 0.015 | 0.001 | 0.001 |
| Dispersion |  |  | 3.04 |  |  | 4.02 |
| Zero-inflated model | | | | | | |
| Intercept (π00) |  |  |  | –1.395*** (.149) | –1.566*** (.175) | –4.640* (2.193) |
| Season (π10) |  |  |  | 0.030* (.014) | 0.021 (.018) | 0.219 (.161) |
| Model fit | | | | | | |
| DF | 11 | 15 | 16 | 13 | 17 | 18 |
| LogL | –3,104 | CP | CP | –3,066 | CP | CP |
| BIC | 6,297 | CP | CP | 6,237 | CP | CP |

*Note*. RIP = random intercept Poisson; NB = negative binomial; ZIP = zero-inflated Poisson; RI-ZIP = random intercept zero-inflated Poisson; ZINB = zero-inflated negative binomial; BIC = Bayesian information criterion; TIME = slope prior to the discontinuity; INTDIS = intercept discontinuity; SLOPEDIS = slope discontinuity; VAR = variance; DF = degrees of freedom; LogL = log likelihood; and CP = convergence problem.

**p* < .05, ***p* < .01, ****p* < .001.

**Table S3**

*Unconditional Discontinuous Growth Models for Drug-related Offenses with Freely Estimated Random Effects on TIME, INTDIS, and SLOPEDIS*

|  | Poisson | RIP | NB | ZIP | RI–ZIP | ZINB |
| --- | --- | --- | --- | --- | --- | --- |
| Count model | | | | | | |
| Fixed effects |  |  |  |  |  |  |
| Intercept (γ00) | –8.748*** (.060) | –8.930*** (.095) |  | –8.288*** (.082) |  | –8.682*** (.091) |
| TIME(γ10) | –0.280*** (.017) | –0.248*** (.016) |  | –0.279*** (.018) |  | –0.241*** (.016) |
| INTDIS (γ20) | 0.778*** (.235) | 0.333 (.310) |  | 0.829** (.253) |  | 0.144 (.295) |
| SLOPEDIS (γ30) | 0.167*** (.047) | 0.165*** (.036) |  | 0.152*** (.044) |  | 0.176*** (.034) |
| Season (γ40) | –0.036*** (.005) | –0.037*** (.005) |  | –0.025* (.012) |  | –0.008 (.009) |
| Random effects |  |  |  |  |  |  |
| Intercept (VAR[]) |  | 0.443 |  |  |  | 0.224 |
| TIME (VAR[]) | 0.005 | 0.003 |  | 0.004 |  | 0.000 |
| INTDIS (VAR[]) | 0.000 | 1.031 |  | 0.000 |  | 0.263 |
| SLOPEDIS (VAR[]) | 0.003 | 0.000 |  | 0.002 |  | 0.000 |
| Dispersion |  |  |  |  |  | 4.28 |
| Zero-inflated model | | | | | | |
| Intercept (π00) |  |  |  | –0.648*** (.180) |  | –4.372*** (1.091) |
| Season (π10) |  |  |  | 0.044 (.031) |  | 0.376*** (.085) |
| Model fit | | | | | | |
| DF | 11 | 15 | 16 | 13 | 17 | 18 |
| LogL | CP | CP | CP | CP | CP | CP |
| BIC | CP | CP | CP | CP | CP | CP |

*Note*. RIP = random intercept Poisson; NB = negative binomial; ZIP = zero-inflated Poisson; RI-ZIP = random intercept zero-inflated Poisson; ZINB = zero-inflated negative binomial; BIC = Bayesian information criterion; TIME = slope prior to the discontinuity; INTDIS = intercept discontinuity; SLOPEDIS = slope discontinuity; VAR = variance; DF = degrees of freedom; LogL = log likelihood; and CP = convergence problem.

**p* < .05, ***p* < .01, ****p* < .001.

**Table S4**

*Unconditional Discontinuous Growth Models for Offenses Against a Person with Freely Estimated Random Effects on INTDIS*

|  | Poisson | RIP | NB | ZIP | RI–ZIP | ZINB |
| --- | --- | --- | --- | --- | --- | --- |
| Count model | | | | | | |
| Fixed effects |  |  |  |  |  |  |
| Intercept (γ00) | –8.417*** (.045) | –8.586*** (.082) | –8.587*** (.085) | –8.170*** (.049) | –8.570*** (.083) | –8.566*** (.085) |
| TIME(γ10) | –0.022** (.007) | –0.022** (.007) | –0.020* (.008) | –0.021** (.008) | –0.020** (.007) | –0.016* (.008) |
| INTDIS (γ20) | –0.600*** (.116) | –0.451*** (.097) | –0.458*** (.105) | –0.618*** (.121) | –0.510*** (.098) | –0.524*** (.106) |
| SLOPEDIS (γ30) | –0.005 (.012) | –0.005 (.012) | –0.007 (.013) | –0.007 (.013) | 0.007 (.013) | –0.004 (.013) |
| Season (γ40) | –0.013*** (.002) | –0.013*** (.002) | –0.012*** (.002) | –0.009** (.003) | –0.016** (.002) | –0.008** (.003) |
| Random effects |  |  |  |  |  |  |
| Intercept (VAR[]) |  | 0.584 | 0.568 |  | 0.575 | 0.563 |
| INTDIS (VAR[]) | 0.554 | 0.039 | 0.001 | 0.522 | 0.024 | 0.007 |
| Dispersion |  |  | 5.27 |  |  | 6.71 |
| Zero-inflated model | | | | | | |
| Intercept (π00) |  |  |  | –1.371*** (.101) | –6.034** (1.887) | –6.823** (2.364) |
| Season (π10) |  |  |  | 0.015 (.011) | –0.274* (.119) | 0.374* (0.176) |
| Model fit | | | | | | |
| DF | 6 | 8 | 9 | 8 | 10 | 11 |
| LogL | –3,948 | –3,625 | CP | –3,856 | –3,619 | –3,599 |
| BIC | 7,946 | 7,316 | CP | 7,777 | 7,318 | 7,286 |

*Note*. RIP = random intercept Poisson; NB = negative binomial; ZIP = zero-inflated Poisson; RI-ZIP = random intercept zero-inflated Poisson; ZINB = zero-inflated negative binomial; BIC = Bayesian information criterion; TIME = slope prior to the discontinuity; INTDIS = intercept discontinuity; SLOPEDIS = slope discontinuity; VAR = variance; DF = degrees of freedom; LogL = log likelihood; and CP = convergence problem.

**p* < .05, ***p* < .01, ****p* < .001.

**Table S5**

*Unconditional Discontinuous Growth Models for Property Offenses with Freely Estimated Random Effects on INTDIS*

|  | Poisson | RIP | NB | ZIP | RI–ZIP | ZINB |
| --- | --- | --- | --- | --- | --- | --- |
| Count model | | | | | | |
| Fixed effects |  |  |  |  |  |  |
| Intercept (γ00) | –8.820*** (.055) | –8.989*** (.089) | –8.972*** (.094) | –8.487*** (.061) | –8.819*** (.094) | –8.947*** (.095) |
| TIME(γ10) | –0.014 (.009) | –0.014 (.009) | –0.014 (.010) | –0.001 (.010) | –0.009 (.009) | –0.009 (.010) |
| INTDIS (γ20) | –0.490*** (.129) | –0.332** (.117) | –0.321** (.123) | –0.366** (.117) | –0.355** (.122) | –0.396** (.124) |
| SLOPEDIS (γ30) | –0.047*** (.014) | –0.047*** (.014) | –0.048** (.016) | –0.061*** (.016) | –0.053*** (.015) | –0.046** (.016) |
| Season (γ40) | –0.006* (.003) | –0.006* (.003) | –0.005 (.003) | –0.001 (.004) | –0.001 (.004) | 0.001 (.004) |
| Random effects |  |  |  |  |  |  |
| Intercept (VAR[]) |  | 0.572 | 0.539 |  | 0.556 | 0.540 |
| INTDIS (VAR[]) | 0.547 | 0.127 | 0.000 | 0.000 | 0.094 | 0.000 |
| Dispersion |  |  | 2.83 |  |  | 3.63 |
| Zero-inflated model | | | | | | |
| Intercept (π00) |  |  |  | –0.707*** (.087) | –1.565*** (.175) | –4.796* (2.333) |
| Season (π10) |  |  |  | 0.009 (.009) | 0.021 (.018) | 0.229 (0.171) |
| Model fit | | | | | | |
| DF | 6 | 8 | 9 | 8 | 10 | 11 |
| LogL | –3,258 | –3,045 | CP | –3,211 | –3,019 | CP |
| BIC | 6,564 | 6,156 | CP | 6,486 | 6,119 | CP |

*Note*. RIP = random intercept Poisson; NB = negative binomial; ZIP = zero-inflated Poisson; RI-ZIP = random intercept zero-inflated Poisson; ZINB = zero-inflated negative binomial; BIC = Bayesian information criterion; TIME = slope prior to the discontinuity; INTDIS = intercept discontinuity; SLOPEDIS = slope discontinuity; VAR = variance; DF = degrees of freedom; LogL = log likelihood; and CP = convergence problem.

**p* < .05, ***p* < .01, ****p* < .001.

**Table S6**

*Unconditional Discontinuous Growth Models for Drug-related Offenses with Freely Estimated Random Effects on INTDIS,*

|  | Poisson | RIP | NB | ZIP | RI–ZIP | ZINB |
| --- | --- | --- | --- | --- | --- | --- |
| Count model | | | | | | |
| Fixed effects |  |  |  |  |  |  |
| Intercept (γ00) | –8.770*** (.060) | –8.892*** (.085) | –8.865*** (.091) | –8.285*** (.080) | –8.686*** (.093) | –8.681*** (.091) |
| TIME(γ10) | –0.264*** (.014) | –0.264*** (.014) | –0.265*** (.016) | –0.265*** (.016) | –0.240*** (.015) | –0.241*** (.016) |
| INTDIS (γ20) | 0.894*** (.231) | 0.894*** (.231) | 0.919*** (.243) | 0.532 (.298) | 0.404 (.247) | 0.143 (.295) |
| SLOPEDIS (γ30) | 0.157*** (.033) | 0.157*** (.033) | 0.154*** (.034) | 0.157*** (.035) | 0.182*** (.033) | 0.176*** (.034) |
| Season (γ40) | –0.038*** (.005) | –0.038*** (.005) | –0.040*** (.005) | –0.024* (.012) | –0.002 (.008) | –0.008 (.009) |
| Random effects |  |  |  |  |  |  |
| Intercept (VAR[]) |  | 0.346 | 0.291 |  | 0.343 | 0.224 |
| INTDIS (VAR[]) | 0.000 | 0.000 | 0.000 | 0.843 | 0.000 | 0.263 |
| Dispersion |  |  | 2.46 |  |  | 4.27 |
| Zero-inflated model | | | | | | |
| Intercept (π00) |  |  |  | –0.600*** (.171) | –3.775*** (1.035) | –4.371*** (1.090) |
| Season (π10) |  |  |  | 0.048 (.029) | 0.345*** (.083) | 0.376*** (.085) |
| Model fit | | | | | | |
| DF | 6 | 8 | 9 | 8 | 10 | 11 |
| LogL | CP | –1,281 | CP | –1,280 | –1,263 | CP |
| BIC | CP | 2,627 | CP | 2,624 | 2,608 | CP |

*Note*. RIP = random intercept Poisson; NB = negative binomial; ZIP = zero-inflated Poisson; RI-ZIP = random intercept zero-inflated Poisson; ZINB = zero-inflated negative binomial; BIC = Bayesian information criterion; TIME = slope prior to the discontinuity; INTDIS = intercept discontinuity; SLOPEDIS = slope discontinuity; VAR = variance; DF = degrees of freedom; LogL = log likelihood; and CP = convergence problem.

**p* < .05, ***p* < .01, ****p* < .001.

**Table S7**

*Conditional Discontinuous Growth Models for Offenses Against a Person*

|  | Poisson | RIP | NB | ZIP | RI–ZIP | ZINB |
| --- | --- | --- | --- | --- | --- | --- |
| Count model | | | | | | |
| Fixed effects |  |  |  |  |  |  |
| Intercept | –8.399*** (.045) | –8.490*** (.068) | –8.490*** (.071) | –8.197*** (.050) | –8.439*** (.068) | –8.459*** (.071) |
| TIME | –0.022** (.007) | –0.022** (.007) | –0.020* (.008) | –0.020** (.008) | –0.016* (.007) | –0.016 (.008) |
| INTDIS | –0.528*** (.104) | –0.445*** (.095) | –0.452*** (.102) | –0.449*** (.100) | –0.545*** (.094) | –0.533*** (.104) |
| SLOPEDIS | –0.005 (.012) | –0.005 (.012) | –0.007 (.013) | –0.006 (.012) | 0.001 (.012) | –0.003 (.013) |
| Season | –0.013*** (.002) | –0.013*** (.002) | –0.012*** (.002) | –0.009** (.003) | –0.004 (.003) | –0.006* (.003) |
| ICE | –2.273*** (.122) | –2.478*** (.261) | –2.477*** (.260) | –1.606*** (.152) | –2.287*** (.262) | –2.301*** (.264) |
| ICE* INTDIS | –0.354 (.316) | –0.205 (.243) | –0.210 (.237) | –0.261 (.239) | –0.174 (.223) | –0.195 (.239) |
| Random effects |  |  |  |  |  |  |
| Intercept |  | 0.296 | 0.278 |  | 0.283 | 0.276 |
| INTDIS | 0.251 | 0.038 | 0.000 | 0.000 | 0.000 | 0.000 |
| Dispersion |  |  | 5.26 |  |  | 6.86 |
| Zero-inflated model | | | | | | |
| Intercept |  |  |  | –1.644*** (.143) | –5.212*** (1.442) | –6.679*** (1.853) |
| Season |  |  |  | 0.019 (.012) | 0.290** (.111) | 0.372** (.140) |
| ICE |  |  |  | 3.403*** (.570) | 3.361*** (.933) | 4.081*** (1.181) |
| Model fit | | | | | | |
| DF | 8 | 10 | 11 | 11 | 13 | 14 |
| LogL | –3,725 | –3,583 | CP | CP | CP | CP |
| BIC | 7,514 | 7,247 | CP | CP | CP | CP |

*Note*. RIP = random intercept Poisson; NB = negative binomial; ZIP = zero-inflated Poisson; RI-ZIP = random intercept zero-inflated Poisson; ZINB = zero-inflated negative binomial; BIC = Bayesian information criterion; TIME = slope prior to the discontinuity; INTDIS = intercept discontinuity; SLOPEDIS = slope discontinuity; DF = degrees of freedom; LogL = log likelihood; and CP = convergence problem.

**p* < .05, ***p* < .01, ****p* < .001.

**Table S8**

*Conditional Discontinuous Growth Models for Property Offenses*

|  | Poisson | RIP | NB | ZIP | RI–ZIP | ZINB |
| --- | --- | --- | --- | --- | --- | --- |
| Count model | | | | | | |
| Fixed effects |  |  |  |  |  |  |
| Intercept | –8.810*** (.056) | –8.890*** (.074) | –8.880*** (.080) | –8.537*** (.062) | –8.699*** (.080) | –8.855*** (.081) |
| TIME | –0.014 (.009) | –0.014 (.009) | –0.014 (.010) | –0.005 (.010) | –0.009 (.009) | –0.009 (.010) |
| INTDIS | –0.421*** (.120) | –0.339** (.115) | –0.315** (.122) | –0.351** (.116) | –0.326** (.114) | –0.391** (.124) |
| SLOPEDIS | –0.047*** (.014) | –0.047*** (.014) | –0.048** (.016) | –0.055*** (.015) | –0.053*** (.015) | –0.046** (.016) |
| Season | –0.006* (.003) | –0.006* (.003) | –0.005 (.003) | –0.001 (.004) | –0.001 (.004) | 0.001 (.004) |
| ICE | –2.463*** (.149) | –2.549*** (.265) | –2.568*** (.268) | –1.941*** (.209) | –2.384*** (.318) | –2.581*** (.274) |
| ICE* INTDIS | 0.069 (.364) | 0.135 (.319) | 0.199 (.290) | 0.349 (.294) | 0.221 (.283) | 0.190 (.289) |
| Random effects |  |  |  |  |  |  |
| Intercept |  | 0.255 | 0.236 |  | 0.241 | 0.236 |
| INTDIS | 0.308 | 0.127 | 0.000 | 0.000 | 0.000 | 0.000 |
| Dispersion |  |  | 2.85 |  |  | 3.67 |
| Zero-inflated model | | | | | | |
| Intercept |  |  |  | –0.995*** (.112) | –1.453*** (.170) | –4.891* (2.319) |
| Season |  |  |  | 0.012 (.011) | 0.018 (.017) | 0.236 (.168) |
| ICE |  |  |  | 1.954*** (.561) | 0.958 (.907) | –0.400 (1.713) |
| Model fit | | | | | | |
| DF | 8 | 10 | 11 | 11 | 13 | 14 |
| LogL | –3,083 | –3,005 | CP | –3,053 | CP | CP |
| BIC | 6,230 | 6,091 | CP | 6,195 | CP | CP |

*Note*. RIP = random intercept Poisson; NB = negative binomial; ZIP = zero-inflated Poisson; RI-ZIP = random intercept zero-inflated Poisson; ZINB = zero-inflated negative binomial; BIC = Bayesian information criterion; TIME = slope prior to the discontinuity; INTDIS = intercept discontinuity; SLOPEDIS = slope discontinuity; DF = degrees of freedom; LogL = log likelihood; and CP = convergence problem.

**p* < .05, ***p* < .01, ****p* < .001.

**Table S9**

*Conditional Discontinuous Growth Models for Drug-related Offenses*

|  | Poisson | RIP | NB | ZIP | RI–ZIP | ZINB |
| --- | --- | --- | --- | --- | --- | --- |
| Count model | | | | | | |
| Fixed effects |  |  |  |  |  |  |
| Intercept | –8.739*** (.060) | –8.826*** (.077) | –8.808*** (.083) | –8.333*** (.087) | –8.628*** (.086) | –8.687*** (.096) |
| TIME | –0.264*** (.014) | –0.264*** (.014) | –0.264*** (.016) | –0.265*** (.016) | –0.240*** (.015) | –0.252*** (.018) |
| INTDIS | 0.561* (.279) | 0.887*** (.232) | 0.906*** (.243) | 0.601* (.291) | 0.400 (.247) | 0.675* (.277) |
| SLOPEDIS | 0.157*** (.033) | 0.157*** (.033) | 0.153*** (.034) | 0.156*** (.034) | 0.181*** (.033) | 0.179*** (.037) |
| Season | –0.038*** (.005) | –0.038*** (.005) | –0.040*** (.005) | –0.029* (.013) | –0.003 (.008) | –0.057*** (.007) |
| ICE | –1.864*** (.228) | –1.915*** (.311) | –1.858*** (.317) | –0.822* (.366) | –1.978*** (.334) | –1.642*** (.379) |
| ICE* INTDIS | –0.266 (.750) | –0.240 (.611) | –0.283 (.629) | –0.349 (.765) | –0.202 (.617) | –0.364 (.629) |
| Random effects |  |  |  |  |  |  |
| Intercept |  | 0.208 | 0.163 |  | 0.203 | 0.149 |
| INTDIS | 0.745 | 0.000 | 0.000 | 0.662 | 0.000 | 0.000 |
| Dispersion |  |  | 2.66 |  |  | 8.54 |
| Zero-inflated model | | | | | | |
| Intercept |  |  |  | –0.888*** (.268) | –3.976*** (1.092) | –2.821*** (.830) |
| Season |  |  |  | 0.041 (.036) | 0.360*** (.087) | –0.181** (.070) |
| ICE |  |  |  | 2.961** (1.120) | –0.391 (1.099) | 0.906 (1.438) |
| Model fit | | | | | | |
| DF | 8 | 10 | 11 | 11 | 13 | 14 |
| LogL | –1,274 | –1,261 | –1,254 | –1,250 | CP | CP |
| BIC | 2,612 | 2,603 | 2,597 | 2,589 | CP | CP |

*Note*. RIP = random intercept Poisson; NB = negative binomial; ZIP = zero-inflated Poisson; RI-ZIP = random intercept zero-inflated Poisson; ZINB = zero-inflated negative binomial; BIC = Bayesian information criterion; TIME = slope prior to the discontinuity; INTDIS = intercept discontinuity; SLOPEDIS = slope discontinuity; DF = degrees of freedom; LogL = log likelihood; and CP = convergence problem.

**p* < .05, ***p* < .01, ****p* < .001.
